# Supplementary material
Source: ML conference proceedings conference paper supplement (https://proceedings.neurips.cc/paper_files/paper/2017/hash/99adff456950dd9629a5260c4de21858-Abstract.html)
Supplement: Supplementary file [file 99adff456950dd9629a5260c4de21858-Supplemental.zip]

## A Proofs

*Proof of Property 1.* Suppose  $\mathbf{v} \in S \in \mathcal{S}(\mathbf{x}_t)$ . Then there exists  $\alpha \in (0, 1)$  and  $\mathbf{z} \in \mathcal{P}$  such that  $\mathbf{x}_t = \alpha \mathbf{v} + (1 - \alpha) \mathbf{z}$ . If  $\langle \mathbf{a}_j, \mathbf{x}_t \rangle = b_j$ , then the fact that  $\langle \mathbf{a}_j, \mathbf{z} \rangle \leq b_j$  implies that  $\langle \mathbf{a}_j, \mathbf{v} \rangle = b_j$ . Conversely, suppose  $\mathbf{v} \in \mathcal{P}$  satisfies  $\langle \mathbf{a}_j, \mathbf{x}_t \rangle = b_j \Rightarrow \langle \mathbf{a}_j, \mathbf{v} \rangle = b_j$  for all  $j$ . Then consider  $\mathbf{z}_\alpha := \frac{1}{1-\alpha}(\mathbf{x}_t - \alpha \mathbf{v})$  for  $\alpha \in (0, 1)$ . If  $j$  satisfies  $\langle \mathbf{a}_j, \mathbf{x}_t \rangle = b_j$ , then clearly  $\langle \mathbf{a}_j, \mathbf{z}_\alpha \rangle = b_j$ . Otherwise if  $\langle \mathbf{a}_j, \mathbf{x}_t \rangle < b_j$ , then  $\lim_{\alpha \downarrow 0} \langle \mathbf{a}_j, \mathbf{z}_\alpha \rangle = \langle \mathbf{a}_j, \mathbf{x}_t \rangle < b_j$ . Since the number of inequality constraint is finite, we can guarantee that  $\mathbf{z}_\alpha \in \mathcal{P}$  as long as the value of  $\alpha$  is small enough.  $\square$

*Proof of Lemma 1.* Denote  $U = (\mathbf{u}_1, \dots, \mathbf{u}_s)$ . Clearly the lowest possible value of  $\mathbf{1}^\top \Delta$  is at most the solution to the following optimization problem

$$\min_{\Delta, \mathbf{z}} \mathbf{1}^\top \Delta \quad (24)$$

$$s.t. \quad \mathbf{0} \leq \Delta \leq \gamma \quad (25)$$

$$\mathbf{y} = \mathbf{x} - U\Delta + (\mathbf{1}^\top \Delta) \mathbf{z} \quad (26)$$

$$\mathbf{z} \in \mathcal{P}, \quad (27)$$

where the inequalities are both elementwise. Obviously the feasible region is not empty because  $\Delta = \gamma$  and  $\mathbf{z} = \mathbf{y}$  is always feasible. When  $\Delta = \mathbf{0}$  is feasible (i.e.  $\mathbf{y} = \mathbf{x}$ ), (33) is obviously satisfied. Otherwise, we have

$$\mathbf{z} = (\mathbf{1}^\top \Delta)^{-1} (\mathbf{y} - \mathbf{x} + U\Delta) \in \mathcal{P}. \quad (28)$$

Notice that  $C\mathbf{z} = \mathbf{d}$  is automatically satisfied because by  $\mathbf{x}, \mathbf{y}, \mathbf{u}_i$  all lying in  $\mathcal{P}$ , we have

$$C\mathbf{z} = (\mathbf{1}^\top \Delta)^{-1} (C\mathbf{y} - C\mathbf{x} + CU\Delta) = (\mathbf{1}^\top \Delta)^{-1} (\mathbf{d} - \mathbf{d} + \mathbf{d} \mathbf{1}^\top \Delta) = \mathbf{d}. \quad (29)$$

So to ensure  $\mathbf{z} \in \mathcal{P}$ , we just need to further enforce  $A\mathbf{z} \leq \mathbf{b}$ , which is equivalent to:

$$(\mathbf{b} \mathbf{1}^\top - AU)\Delta \geq A(\mathbf{y} - \mathbf{x}). \quad (30)$$

Denote  $F = \mathbf{b} \mathbf{1}^\top - AU$ . Then by the definition of  $g_k$ , all entries in the  $k$ -th row of  $F$  are either 0, or at least  $g_k$ . For any  $i \in [s]$ , there exists a row index  $k_i$  of  $F$  such that  $F_{k_i, i} > 0$  and the inequality in (30) holds with equality for the  $k_i$ -th row. This is because, we can otherwise further reduce  $\Delta_i$  to improve the objective function. Denoting by  $I(k_i)$  the set of columns that are not zero in the  $k_i$ -th row of  $F$ , we now have

$$F_{k_i, :} \Delta = \mathbf{a}_{k_i}^\top (\mathbf{y} - \mathbf{x}) \Rightarrow \mathbf{a}_{k_i}^\top (\mathbf{y} - \mathbf{x}) \geq g_{k_i} \sum_{j \in I(k_i)} \Delta_j. \quad (31)$$

Therefore, denoting  $K = \{k_i : i \in [s]\}$ , we have  $|K| \leq s$  and we finally arrive at

$$\begin{aligned} \sum_{i=1}^s \Delta_i &\leq \sum_{k \in K} \sum_{i \in I(k)} \Delta_i \leq \sum_{k \in K} \frac{1}{g_k} \mathbf{a}_k^\top (\mathbf{y} - \mathbf{x}) = \sum_{j=1}^n \left[ \left( \sum_{k \in K} \frac{a_{kj}}{g_k} \right) (y_j - x_j) \right] \\ &\leq \|\mathbf{y} - \mathbf{x}\| \left[ \sum_{j=1}^n \left( \sum_{k \in K} \frac{a_{kj}}{g_k} \right)^2 \right]^{1/2} \leq H_s \|\mathbf{y} - \mathbf{x}\|. \end{aligned} \quad (32) \quad \square$$

Incidentally, if  $\mathcal{P}$  is not a polytope, then generally there is some  $\mathbf{a}_k$  such that the  $g_k$  defined in (5) is 0, even though  $\mathbf{a}_k$  is not an equality constraint. Besides there can be an uncountable number of linear inequality constraints to define, say, a unit  $L_2$  ball.

Before proving (4), we need a slight enhancement of Lemma 1 that swaps the role of  $\mathbf{x}$  and  $\mathbf{y}$ .

**Lemma 5.** Let  $\mathbf{x}, \mathbf{y} \in \mathcal{P}$ . Suppose  $\mathbf{y}$  can be written as the convex hull of  $s$  vertices of  $\mathcal{P}$ . Then we can write  $\mathbf{x}$  as the convex combination of vertices of  $\mathcal{P}$ ,  $\mathbf{x} = \sum_{i=1}^k \lambda_i \mathbf{v}_i$  for some integer  $k$ , such that  $\mathbf{y}$  can be written as  $\mathbf{y} = \sum_{i=1}^k (\lambda_i - \Delta_i) \mathbf{v}_i + (\mathbf{1}^\top \Delta) \mathbf{z}$  with  $\Delta_i \in [0, \lambda_i]$  for all  $i \in [k]$ ,  $\mathbf{z} \in \mathcal{P}$ , and

$$\mathbf{1}^\top \Delta \leq \sqrt{H_s} \|\mathbf{x} - \mathbf{y}\|. \quad (33)$$

*Proof of Lemma 5.* By assumption we can write  $\mathbf{y} = \sum_{i=1}^s \gamma_i \mathbf{u}_i$  for  $\mathbf{u}_i$  being vertices of  $\mathcal{P}$ ,  $\gamma_i \geq 0$ , and  $\mathbf{1}^\top \gamma = 1$ . By Lemma 1,  $\mathbf{x}$  can be written as  $\mathbf{x} = \sum_{i=1}^s (\gamma_i - \delta_i) \mathbf{u}_i + (\mathbf{1}^\top \delta) \mathbf{w}$ , where  $\mathbf{w} \in \mathcal{P}$ ,  $\delta_i \in [0, \gamma_i]$ , and  $\sum_{i=1}^s \delta_i \leq H_s \|\mathbf{x} - \mathbf{y}\|$ .

Now suppose  $\mathbf{w} = \sum_{j=1}^t \alpha_j \mathbf{s}_j$ , where  $\mathbf{s}_j$  are vertices of  $\mathcal{P}$ ,  $\alpha_j \in [0, 1]$  and  $\mathbf{1}^\top \alpha = 1$ . Letting  $r = \mathbf{1}^\top \delta$ , we have

$$\mathbf{x} = \sum_i \underbrace{(\gamma_i - \delta_i)}_{\lambda_i} \mathbf{u}_i + \sum_j \underbrace{(r\alpha_j)}_{\lambda'_j} \mathbf{s}_j \quad (34)$$

$$\mathbf{y} = \sum_i \underbrace{(\gamma_i - \delta_i - 0)}_{\lambda_i} \mathbf{u}_i + \sum_j \underbrace{(r\alpha_j - r\alpha_j)}_{\lambda'_j} \mathbf{s}_j + r \underbrace{\sum_i \frac{\delta_i}{r} \mathbf{u}_i}_{\mathbf{z}}. \quad (35)$$

So now we have found a decomposition of  $\mathbf{x}$ , where  $\{\mathbf{v}_i\}$  corresponds to the union of  $\{\mathbf{u}_i\}$  (with weights  $\lambda_i = \gamma_i - \delta_i$ ) and  $\{\mathbf{s}_j\}$  (with weights  $\lambda'_j = r\alpha_j$ ). Furthermore,  $\Delta_i = 0$  for  $\mathbf{u}_i$  and  $\Delta'_j = r\alpha_j$  for  $\mathbf{s}_j$ .  $\mathbf{z}$  corresponds to  $\sum_i \frac{\delta_i}{r} \mathbf{u}_i \in \mathcal{P}$ , and notice that  $\sum_i \Delta_i + \sum_j \Delta'_j = r = \sum_i \delta_i$ .  $\square$

One might thus wonder why we do not eliminate inequality constraints altogether by introducing slack variables. The answer is that first the diameter  $D$  of the new polytope will grow in the number of constraints which can be arbitrarily higher than the original dimensionality, and the rate of convergence depends on  $D^2$ . Second, even if the original polytope has all vertices being binary, the vertices of the augmented polytope are not necessarily binary (e.g.  $\mathcal{Q}_k$  with  $y = k - \mathbf{1}^\top \mathbf{x}$ ). So in the sequel, we will not complicate ourselves with “smart” reformulations of the polytope.

*Proof of Equation (4).* By strong convexity, we have  $\sqrt{2H_s h_t / \alpha} \geq \sqrt{H_s} \|\mathbf{x}_t - \mathbf{x}^*\|$ . By Lemma 5, we can write  $\mathbf{x}_t$  as a convex combination of  $\mathbf{x}_t = \sum_{i=1}^k \mathbf{u}_i$  and  $\mathbf{x}^*$  as  $\mathbf{x}^* = \sum_{i=1}^k (\lambda_i - \Delta_i) \mathbf{v}_i + (\mathbf{1}^\top \Delta) \mathbf{z}$ , where  $\Delta_i \in [0, \lambda_i]$ ,  $\mathbf{z} \in \mathcal{P}$ , and  $\mathbf{1}^\top \Delta \leq \sqrt{H_s} \|\mathbf{x}_t - \mathbf{x}^*\| \leq \sqrt{2H_s h_t / \alpha}$ . Therefore, we get the first inequality in (4) by

$$\left\langle \sqrt{2H_s h_t / \alpha} (\mathbf{v}_t^+ - \mathbf{v}_t^-), \nabla f(\mathbf{x}_t) \right\rangle \leq \sum_{i=1}^k \Delta_i \langle \mathbf{v}_t^+ - \mathbf{v}_t^-, \nabla f(\mathbf{x}_t) \rangle \quad (36)$$

$$\leq \sum_{i=1}^k \Delta_i \langle \mathbf{z} - \mathbf{v}_i, \nabla f(\mathbf{x}_t) \rangle = \langle \mathbf{x}^* - \mathbf{x}_t, \nabla f(\mathbf{x}_t) \rangle, \quad (37)$$

where the first inequality follows since  $\langle \mathbf{v}_t^+ - \mathbf{v}_t^-, \nabla f(\mathbf{x}_t) \rangle \leq 0$ , and the second inequality follows from the optimality of  $\mathbf{v}_t^+$  and  $\mathbf{v}_t^-$  (Property 1).  $\square$

**Lemma 6** (Feasibility of iterates for PFW-1). *Suppose  $\mathcal{P}$  is an SLP, and the reference step sizes  $\{\gamma_t\}_{t \geq 1}$  are contained in  $[0, 1]$ . Then the iterates generated by PFW-1 are always feasible.*

*Proof of Lemma 6.* We prove by induction that  $\mathbf{s}_t := \mathbf{x}_t / \eta_t = q_t \mathbf{x}_t$  is integral in all coordinates and  $\mathbf{x}_t \in [0, 1]^n$ . When  $t = 1$ , since  $\mathbf{x}_1$  is an extreme point, it must lie in  $\{0, 1\}^n$ . Then  $\mathbf{s}_1 = q_1 \mathbf{x}_1$  must be integral because  $q_1$  is. Now assuming the induction holds for some  $t \geq 1$ , then

$$\mathbf{s}_{t+1} = q_{t+1} \mathbf{x}_{t+1} = q_{t+1} (\mathbf{x}_t + \eta_t (\mathbf{v}_t^+ - \mathbf{v}_t^-)) = \frac{q_{t+1}}{q_t} \mathbf{z}_t, \quad \text{where } \mathbf{z}_t := \mathbf{s}_t + \mathbf{v}_t^+ - \mathbf{v}_t^-. \quad (38)$$

Consider three cases noting that both  $\mathbf{v}_t^+$  and  $\mathbf{v}_t^-$  are in  $\{0, 1\}^n$ :

- If  $x_t(i) = 0$ , then  $v_t^-(i) = s_t(i) = 0$ , and so  $z_t(i) \in \{0, 1\}$ .
- If  $x_t(i) = 1$ , then  $v_t^-(i) = 1$  and  $s_t(i) = q_t$ . So  $0 \leq z_t(i) \leq q_t + 1 - 1 = q_t$ .
- If  $x_t(i) \in (0, 1)$ , then  $s_t(i) \in [1, q_t - 1]$ . So  $0 \leq z_t(i) \leq q_t - 1 + 1 = q_t$ .

To summarize, in all these cases,  $x_{t+1}(i) = z_t(i) / q_t \in [0, 1]$ , and  $z_t(i)$  is obviously integral. Therefore,  $\mathbf{s}_{t+1} = \frac{q_{t+1}}{q_t} \mathbf{z}_t$  is integral as  $\frac{q_{t+1}}{q_t}$  is integral.  $\square$

*Proof of Lemma 2.* To present a unified proof, we do not consider the phase of  $t < n_0$  and  $t \geq n_0$  separately. When  $t < n_0$  we can equivalently set  $\gamma_t = 1$  and let AFW-1 always take a FW step up to step  $n_0$ . We prove by induction that  $\mathbf{s}_t := q_{t-1}\mathbf{x}_t$  is integral in all coordinates and  $\mathbf{x}_t \in [0, 1]^n$ . When  $t = 1$ , since  $\mathbf{x}_1$  is an extreme point, it must lie in  $\{0, 1\}^n$ . Then  $\mathbf{s}_1 = q_0\mathbf{x}_1 = \mathbf{x}_1$  must be integral because  $q_0 = 1$ . Now assuming the induction holds for some  $t \geq 1$ , then

$$\mathbf{s}_{t+1} = q_t \mathbf{x}_{t+1} = \begin{cases} q_t \left( \frac{q_t-1}{q_t} \mathbf{x}_t + \frac{1}{q_t} \mathbf{v}_t^+ \right) = 2^s q_{t-1} \mathbf{x}_t + \mathbf{v}_t^+ = 2^s \mathbf{s}_t + \mathbf{v}_t^+, & \text{if step } t \text{ is FW} \\ q_t \left( \frac{q_t+1}{q_t} \mathbf{x}_t - \frac{1}{q_t} \mathbf{v}_t^- \right) = 2^s q_{t-1} \mathbf{x}_t - \mathbf{v}_t^- = 2^s \mathbf{s}_t - \mathbf{v}_t^-, & \text{if step } t \text{ is away} \end{cases} \quad (39)$$

So in both cases,  $\mathbf{s}_{t+1}$  is integral by induction. Obviously  $\mathbf{x}_{t+1} \in [0, 1]^n$  if step  $t$  is FW. When step  $t$  is away, consider three cases noting that both  $\mathbf{v}_t^+$  and  $\mathbf{v}_t^-$  are in  $\{0, 1\}^n$ :

- If  $x_t(i) = 0$ , then  $v_t^-(i) = 0$  and  $s_t(i) = 0$ . Thus  $s_{t+1}(i) = 0$  and  $x_{t+1}(i) = 0$ .
- If  $x_t(i) = 1$ , then  $v_t^-(i) = 1$  and  $x_{t+1}(i) = 1$ .
- If  $x_t(i) \in (0, 1)$ , then  $s_t(i) \in [1, q_{t-1} - 1]$ . So

$$\begin{aligned} \mathbf{x}_{t+1}(i) &= \left(1 + \frac{1}{q_t}\right) \mathbf{x}_t(i) - \frac{1}{q_t} \mathbf{v}_t^-(i) = \frac{1}{q_t} (2^s q_{t-1} \mathbf{x}_t(i) - \mathbf{v}_t^-(i)) \\ &\begin{cases} \geq \frac{1}{q_t} (2^s - 1) \geq 0 \\ \leq \frac{1}{q_t} 2^s (q_{t-1} - 1) = \frac{2^s (q_{t-1} - 1)}{2^s q_{t-1} - 1} \leq 1 \end{cases} \quad \square \end{aligned}$$

*Proof of Lemma 3.* By Eq 4 of [4], we have  $h_{t+1} \leq (1 - \eta_t)h_t + \eta_t^2 M_2$ . Clearly  $h_1 \leq M_2$  and  $h_2 \leq M_2$ . Assume the result holds for some  $t \in [2, n_0 - 1]$ . Then by induction,

$$h_{t+1} \leq \frac{t-1}{t} h_t + \frac{1}{t^2} M_2 \leq \frac{t-1}{t} \frac{3}{t} M_2 \log t + \frac{1}{t^2} M_2 \leq \frac{3}{t+1} M_2 \log(t+1). \quad \square$$

*Proof of Lemma 4.* b) Since  $\gamma_{t+1}^{-1} - \gamma_t^{-1}$  increases in  $t$ , so

$$\gamma_{t+1}^{-1} - \gamma_t^{-1} \geq 1 \quad \Leftrightarrow \quad \gamma_{n_0+1}^{-1} - \gamma_{n_0}^{-1} \geq 1 \quad (40)$$

$$\Leftrightarrow (1 - c_1)^{1-n_0} \geq \frac{M_1^2 c_0}{\theta^2 M_2^2} (1 - (1 - c_1)^{-0.5})^{-2} \approx \frac{M_1^2 c_0}{\theta^2 M_2^2} \frac{4}{c_1^2} \quad (41)$$

$$\Leftrightarrow \frac{c_0 n_0}{3 M_2 \log n_0} \geq \frac{M_1^2 c_0}{\theta^2 M_2^2} \frac{4}{c_1^2} \quad \Leftrightarrow \quad \frac{n_0}{\log n_0} \geq \frac{12 M_1^2}{\theta^2 M_2 c_1^2}. \quad (42)$$

If we approximate  $n_0 / \log n_0$  by  $n_0$ , then using  $n_0 c_1 \approx 1$  we obtain

$$c_1 \geq \frac{12 M_1^2}{M_2} \quad \Leftrightarrow \quad \frac{M_1^2}{M_2} \frac{\theta - 4}{4 \theta^2} \geq \frac{12 M_1^2}{\theta^2 M_2 c_1^2}. \quad (43)$$

This holds as equality since  $\theta = 52$ . If we do not ignore the log term, then note that for  $n_0 / \log n_0 = a$ , we only need to set  $n_0 = a \cdot \log a \cdot \log \log a \dots$ , until the log of the log (and so on) is less than 1. Since  $\log a = \log(12 M_1^2 / (\theta^2 M_2 c_1^2))$  can be considered as a small *universal* constant, the subsequent proof only needs to be scaled slightly.

a) Obviously  $\gamma_t$  is decreasing and hence it suffices to show  $\gamma_{n_0} \leq 1$ . By using (41), we get

$$\gamma_{n_0} = \frac{M_1}{\theta M_2} \sqrt{c_0} (1 - c_1)^{(n_0-1)/2} \leq \frac{M_1}{\theta M_2} \sqrt{c_0} \cdot \frac{\theta M_2 c_1}{2 M_1 \sqrt{c_0}} = \frac{c_1}{2} < 1. \quad (44)$$

c) By definition,  $\eta_t = q_t^{-1} \leq 1 / \lceil \gamma_t^{-1} \rceil \leq \gamma_t$ . To show  $\frac{1}{4} \gamma_t \leq \eta_t$ , it suffices to show  $\eta_t^{-1} \leq 2 \lceil \gamma_t^{-1} \rceil$  because  $\lceil \gamma_t^{-1} \rceil \leq 2 \gamma_t^{-1}$  ( $\gamma_t \leq 1$ ). To prove  $\eta_t^{-1} \leq 2 \lceil \gamma_t^{-1} \rceil$ , we first note that it holds for  $t = n_0$  because  $\eta_{n_0}^{-1} = n_0 = \lceil c_1^{-1} \rceil \leq 2 \lceil 2 c_1^{-1} \rceil \leq 2 \lceil \gamma_{n_0}^{-1} \rceil$  (the last inequality is by (44)). Assuming  $q_t = \eta_t^{-1} \leq 2 \lceil \gamma_t^{-1} \rceil$  holds for some  $t \geq n_0$ , we next perform induction on  $t + 1$  by considering four cases.

- $s = 0$  and the step is FW. Note  $q_{t+1} = q_t + 1 \leq 2 \lceil \gamma_t^{-1} \rceil + 1 \leq 2 \lceil \gamma_{t+1}^{-1} \rceil - 1$ . The last inequality is because  $\gamma_{t+1}^{-1} - \gamma_t^{-1} \geq 1$  (in b) implies  $\lceil \gamma_{t+1}^{-1} \rceil - \lceil \gamma_t^{-1} \rceil \geq 1$ .
- $s = 0$  and the step is away. By induction,  $q_{t+1} = q_t - 1 \leq 2 \lceil \gamma_t^{-1} \rceil - 1 < 2 \lceil \gamma_{t+1}^{-1} \rceil$  because  $\gamma_t$  is decreasing in  $t$ .
- $s \geq 1$  and the step is FW. By definition,  $2^{s-1}q_t + 1 < \lceil \gamma_{t+1}^{-1} \rceil$ . Thus  $q_{t+1} = 2^s q_t + 1 \leq 2 \lceil \gamma_{t+1}^{-1} \rceil - 1 < 2 \lceil \gamma_{t+1}^{-1} \rceil$ .
- $s \geq 1$  and the step is away. By definition,  $2^{s-1}q_t - 1 < \lceil \gamma_{t+1}^{-1} \rceil$ . Since both sides of the inequality are integers, this means  $2^{s-1}q_t - 1 \leq \lceil \gamma_{t+1}^{-1} \rceil - 1$ . Thus

$$q_{t+1} = 2^s q_t - 1 \leq 2 \lceil \gamma_{t+1}^{-1} \rceil - 1 < 2 \lceil \gamma_{t+1}^{-1} \rceil. \quad \square$$

*Proof of Example 5.* In fact let  $n = 2^q$  for some positive integer  $q$ , and  $\mathbf{x}_1 = \epsilon \sum_{i=1}^n i \mathbf{e}_i$ . Then it is easy to see that  $\mathbf{x}_1 = H \cdot \frac{n\epsilon}{n-1} (2^0, 2^1, \dots, 2^{q-1})^\top$ , where  $H$  is a  $2^q \times q$  matrix whose rows enumerate all the binary assignments of  $q$  bits. So  $\mathbf{x}_1$  is the convex combination of  $q + 1$  vertices ( $\mathbf{0}$  included). It turns out that AFW-2 will first pick an away direction  $\mathbf{1}$ , then another away direction  $\mathbf{1} - \mathbf{e}_1$ , followed by  $\mathbf{1} - \mathbf{e}_1 - \mathbf{e}_2$ , etc.  $\square$

## B Details of Updates for AFW and PFW on SVM

Given the gradient  $\mathbf{g}$ , the FW and away directions can be computed efficiently. The FW direction needs to solve

$$\min_{\mathbf{v}} \mathbf{v}^\top \mathbf{g}, \quad \text{s.t.} \quad \mathbf{v} \in [0, 1]^n, \quad \sum_{i \in P} v_i = \sum_{j \in N} v_j, \quad (45)$$

where  $P$  and  $N$  are the index set of positive and negative examples respectively. To solve it, one just needs to sort  $\{g_i : i \in P\}$  and  $\{g_j : j \in N\}$  separately in a decreasing order, e.g.  $g_{i_1}^+ \geq g_{i_2}^+ \geq \dots$ . Then we just need to find the smallest  $k$  such that  $g_{i_k}^+ + g_{j_k}^- < 0$ , or  $|P|$ , or  $|N|$ , whichever is the smallest. The away direction is similar, and  $\mathcal{P}(\mathbf{x}_t)$  simply forces some  $v_i$  to be either 0 or 1.

The final line search can be written as  $\min_{\eta \geq 0} \frac{1}{2} \eta^2 \mathbf{d}_t^\top Q \mathbf{d}_t + \eta \mathbf{x}_t^\top Q \mathbf{d}_t - \eta \frac{1}{C} \mathbf{1}^\top \mathbf{d}_t$ , s.t.  $\mathbf{x}_t + \eta \mathbf{d}_t \in [0, 1]^n$ . We have shown above how to compute  $Q \mathbf{d}_t$  efficiently. The constraint effectively restricts  $\eta$  to an interval, and so the optimal  $\eta$  for the quadratic objective can be found in closed form.

### B.1 Computational efficiency per iteration.

Denote  $\mathbf{z} = [\mathbf{u}; \mathbf{v}]$ . At each step  $t$  of AFW and PFW, one needs to compute the gradient in  $\mathbf{z}$ , which is exactly  $Q \mathbf{z}_t$ . Suppose the part corresponding to  $\mathbf{u}$  is  $\mathbf{g}_u$ . Then the FW direction needs to solve  $\min_{\mathbf{u} \in \mathcal{P}_K} \mathbf{u}^\top \mathbf{g}_u$ . This can be easily solved by finding the largest  $K$  coordinates of  $\mathbf{g}_u$ . For away-step, it simply clamps some elements in  $\mathbf{u}$  to 0 or 1. So  $\mathbf{d}_t$  in AFW and PFW have at most  $2K$  and  $4K$  nonzeros respectively, and it costs  $O(nK)$  time to update the gradient. The scheme is very similar to that for dual SVM.

### B.2 Translation between RC-Hull (23) and SVM Dual (20)

Theorem 4.4 of [21] showed how to convert the optimal  $(\mathbf{u}, \mathbf{v})$  of RC-Hull to the optimal solution of SVM-Dual. In short, one first computes  $\boldsymbol{\theta}$  of RC-Margin by  $\boldsymbol{\theta} = \frac{1}{K} (A\mathbf{u} - B\mathbf{v})$ . Then fixing  $\boldsymbol{\theta}$ , we can find the optimal  $\alpha$  and  $\beta$  for RC-Margin with a closed form (see Appendix B.3). Next we compute a scaling factor  $\delta = \frac{2}{\alpha + \beta}$ , and the  $C$  can be recovered by  $C = \frac{\delta}{K}$ . Finally the optimal  $\mathbf{x}$  of SVM-Dual is simply  $(\mathbf{u}^\top, \mathbf{v}^\top)^\top$ , assuming all positive examples are indexed before negative examples. As a result, the number of support vector in SVM-Dual is exactly the number of zeros in the optimal solution of RC-Hull.

### B.3 Finding $\alpha$ and $\beta$ given $\boldsymbol{\theta}$ in RC-Margin

Given  $w$  to find the biases  $\alpha$  and  $\beta$  we need to solve the following optimization problem:

$$\begin{aligned}
& \min_{\alpha, \beta, \xi, \eta} D \left( \sum_i \xi_i + \sum_i \eta_i \right) - \alpha + \beta \\
& \text{s.t.} \quad A_i w - \alpha + \xi_i \geq 0 \quad \xi_i \geq 0 \\
& \quad \quad -B_i w - \beta + \eta_i \geq 0 \quad \eta_i \geq 0
\end{aligned}$$

**Solution.** Note that  $\alpha$  and  $\beta$  are decoupled in the above equation so we're going to solve them separately:

$$\begin{aligned}
& \min_{\alpha, \xi} D \sum_i \xi_i - \alpha \\
& \text{s.t.} \quad \xi_i \geq \alpha - a_i \quad \xi_i \geq 0,
\end{aligned}$$

where  $a_i = A_i w$  are constants. WOLG, assume  $a_1 \leq a_2 \leq \dots \leq a_n$ . Suppose  $\alpha^*$  is the solution to this problem. We can easily show that  $a_1 \leq \alpha^{*2}$ . Suppose  $k$  is the largest index that  $a_k \leq \alpha^*$ . Hence, we'll have:

$$\xi_i^* = \begin{cases} \alpha^* - a_i & \text{if } i \leq k \\ 0 & \text{if } i > k \end{cases}.$$

Thus, we have:

$$D \sum_i \xi_i^* - \alpha^* = D \sum_{i=1}^k (\alpha^* - a_i) - \alpha^* = (kD - 1)\alpha^* - D \sum_{i=1}^k a_i.$$

So  $\alpha^*$  is minimizing this expression subject to  $\alpha^* \geq a_k$ . It is obvious in this case  $\alpha^* = a_k$ . Thus, we can write down:

$$D \sum_i \xi_i^* - \alpha^* = ((k-1)D - 1)a_k - D \sum_{i=1}^{k-1} a_i$$

So the problem is to find the  $k$  that minimizes  $-(1 - (k-1)D)a_k - D \sum_{i=1}^{k-1} a_i$ . As long as  $k-1 \leq \frac{1}{D}$  this expression is negative of a convex combination of  $a_1, a_2, \dots, a_k$  and since  $a_i$ 's are increasing in  $k$ , the expression is decreasing in  $k$  as well until we reach a  $k$  that  $k-1 > \frac{1}{D}$ . After that point the expression is increasing in  $k$  since the coefficient of largest  $a_i$  is positive. To see this, consider two consecutive expressions

$$\begin{aligned}
& ((k-1)D - 1)a_k - D \sum_{i=1}^{k-1} a_i < (kD - 1)a_{k+1} - D \sum_{i=1}^k a_i \\
& \Leftrightarrow (kD - 1)a_k < (kD - 1)a_{k+1}.
\end{aligned}$$

So as long as  $kD < 1$  or  $k < \frac{1}{D}$ , the expression is decreasing in  $k$  and when  $k > \frac{1}{D}$  it is increasing so the minimum is where  $k = \lceil \frac{1}{D} \rceil$ . If  $k = \frac{1}{D}$ , the expression is the same for  $k$  and  $k+1$  (In this case any  $a_k \leq \alpha^* \leq a_{k+1}$  is a solution to this problem).

---

<sup>2</sup>Suppose  $\alpha^* < a_1$ . Therefore,  $\xi_i^* = 0$  for all  $i$ .  $D \sum_i \xi_i^* - \alpha^* = -\alpha^* > -a_1$ .
